# Supplementary material for: A comparative study of H2 sensing performance of stoichiometric polymorphs of titanium carbide MXenes loaded with Pd nanodots
Source: Royal Society of Chemistry journal article supplement (doi:10.1039/d3cp01639k), 2023-01-01
Supplement: d3cp01639k1.pdf [file d3cp01639k1.pdf]

**Supporting Information**

**for**

**Comparative Study of H<sub>2</sub> Sensing Performance of Stoichiometric  
Polymorphs of Titanium Carbide MXenes Loaded with Pd NDs**

Zhiwei Yang<sup>1</sup>, Lijuan Dong<sup>1</sup>, Qian Chen<sup>2</sup>, Zeyi Wang<sup>1</sup>, Jiacheng Cao<sup>2</sup>, Mengwei  
Dong<sup>1</sup>, Jian Wang<sup>1</sup>, Jian Zhang<sup>1\*</sup>, Xiao Huang<sup>1\*</sup>

1. Institute of Advanced Materials (IAM), Nanjing Tech University (NanjingTech),  
30 South Puzhu Road, Nanjing 211816, P.R. China;

2. Frontiers Science Center for Flexible Electronics, Xi'an Institute of Flexible  
Electronics (IFE) and Xi'an Institute of Biomedical Materials & Engineering,  
Northwestern Polytechnical University, 127 West Youyi Road, Xi'an 710072, China.

\* Corresponding authors: Jian Zhang, Xiao Huang

E-mail addresses: iamjzhang@njtech.edu.cn, iamxhuang@njtech.edu.cn

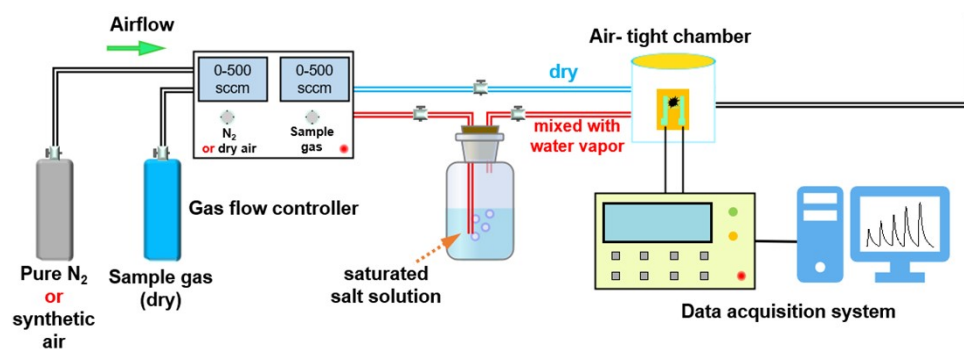

**Fig. S1** Schematic of the gas sensing setup used in this study. The target gases with specific concentrations were obtained by changing the flow rates of the sample gas and the carrier gas, i.e.  $N_2$  or dry air. As for humid air sensing, the relative humidity (RH) was controlled by passing the target gas through a bottle of saturated salt solution. The type of saturated solutions ( $LiF$ ,  $MgCl$  and  $NaNO_3$  for 11%, 33% and 74% RH, respectively) determines the relative humidity.

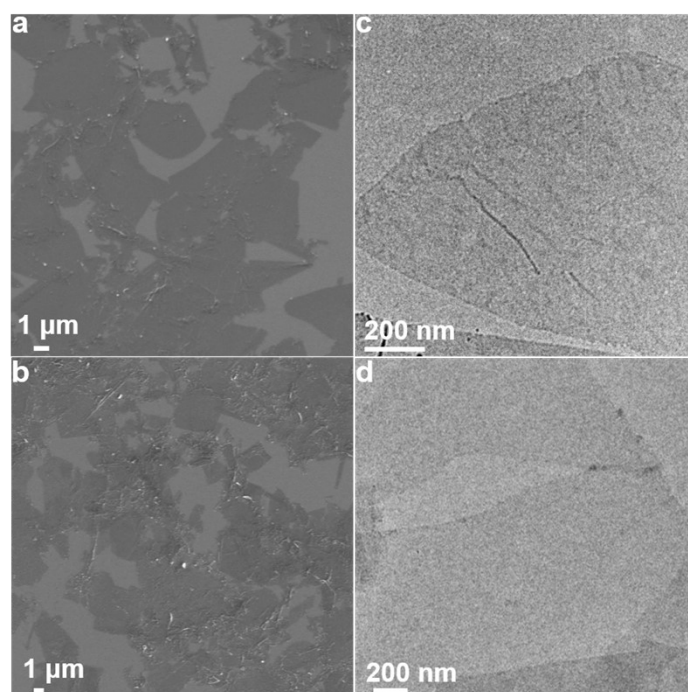

**Fig. S2** SEM images of (a)  $Ti_2CT_x$  and (b)  $Ti_3C_2T_x$ ; TEM images of (c)  $Ti_2CT_x$  and (d)  $Ti_3C_2T_x$ .

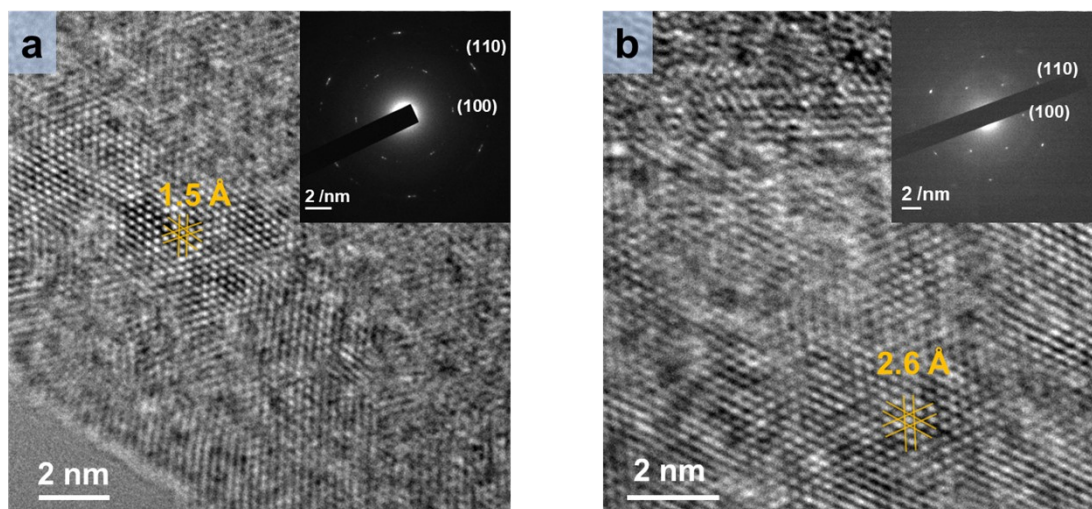

**Fig. S3** High-magnification TEM images of (a)  $\text{Ti}_2\text{CT}_x$  and (b)  $\text{Ti}_3\text{C}_2\text{T}_x$ ; insets show the corresponding electron diffraction pattern.

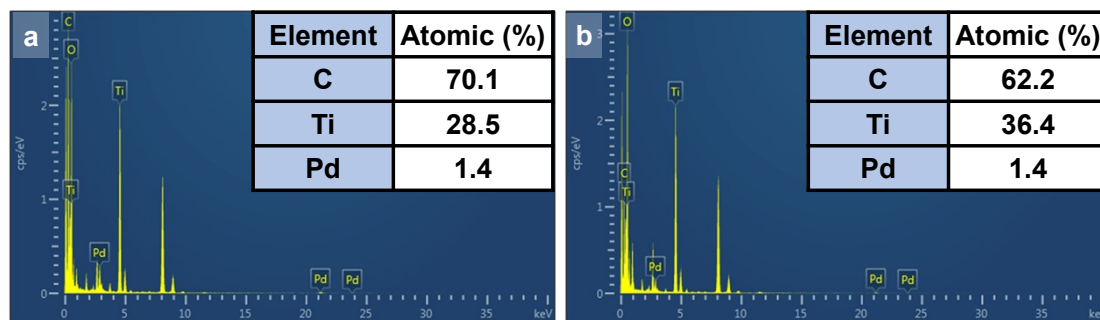

**Fig. S4** Atomic ratio of elements based on EDX mapping results. (a)  $\text{Pd}/\text{Ti}_2\text{CT}_x$ ; (b)  $\text{Pd}/\text{Ti}_3\text{C}_2\text{T}_x$ .

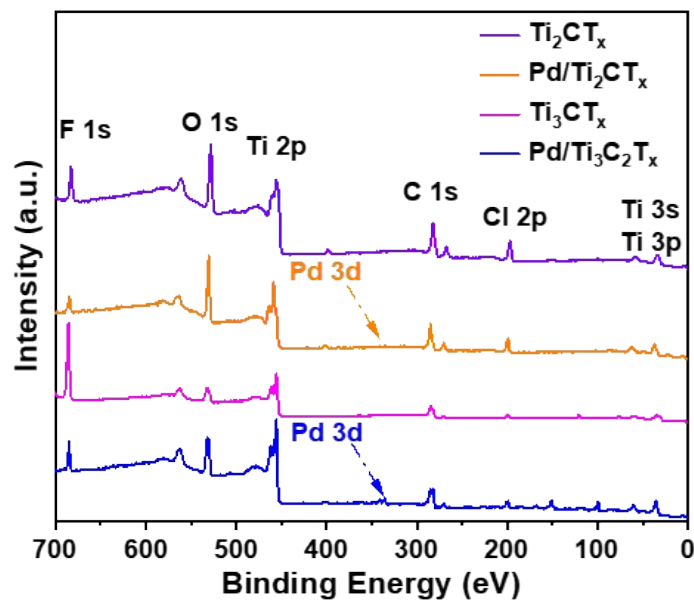

**Fig. S5** XPS full spectra of as-prepared samples.

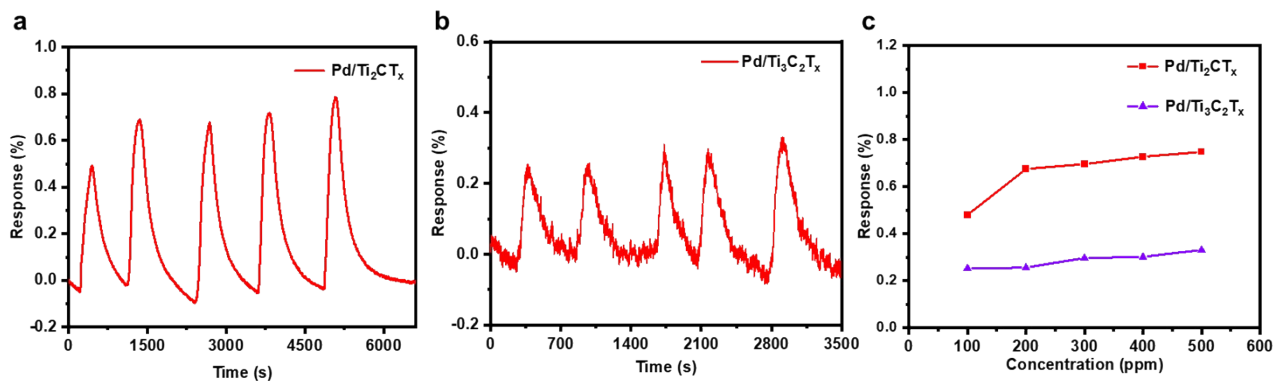

**Fig. S6** Gas sensing performance of Pd/MXene in dry air. Dynamic response-recovery curves of (a) Pd/Ti<sub>2</sub>CT<sub>x</sub> and (b) Pd/Ti<sub>3</sub>C<sub>2</sub>T<sub>x</sub> to different concentration of H<sub>2</sub> after baseline removal. (c) Relationships between H<sub>2</sub> concentration and responses of Pd/Ti<sub>2</sub>CT<sub>x</sub> and Pd/Ti<sub>3</sub>C<sub>2</sub>T<sub>x</sub>.

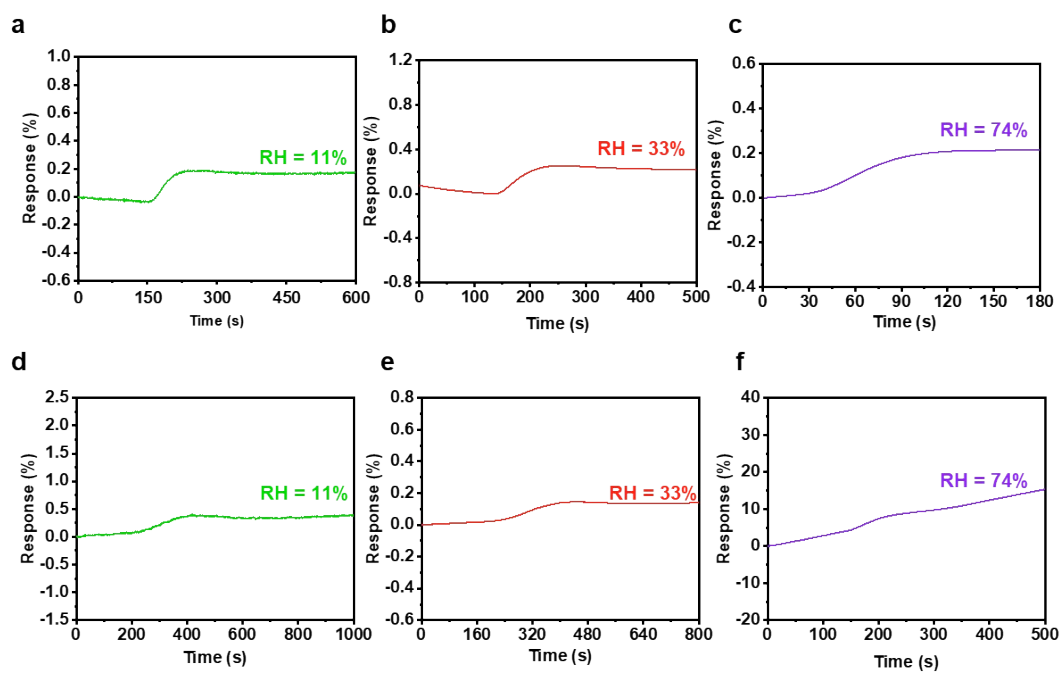

**Fig. S7** Gas sensing performance of Pd/MXene in humid air. Response of (a-c)  $Pd/Ti_2CT_x$  and (d-f)  $Pd/Ti_3C_2T_x$  nanosheets upon exposure to 200 ppm of  $H_2$  with different humidity.

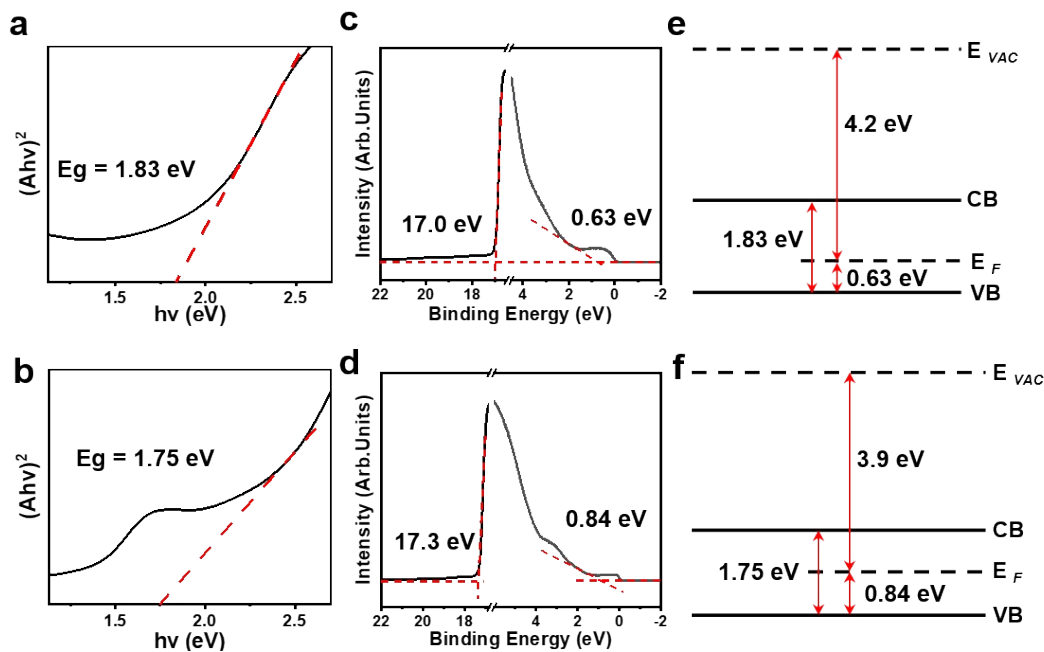

**Fig. S8** Optical absorption spectra of (a)  $\text{Ti}_2\text{CT}_x$  and (b)  $\text{Ti}_3\text{C}_2\text{T}_x$ , showing the plots of  $(\alpha h\nu)^2$  against photon energy. UPS and XPS valence spectra of (c)  $\text{Ti}_2\text{CT}_x$  and (d)  $\text{Ti}_3\text{C}_2\text{T}_x$ . The corresponding energy band structures of (e)  $\text{Ti}_2\text{CT}_x$  and (f)  $\text{Ti}_3\text{C}_2\text{T}_x$  based on the UV-vis, UPS and XPS results.

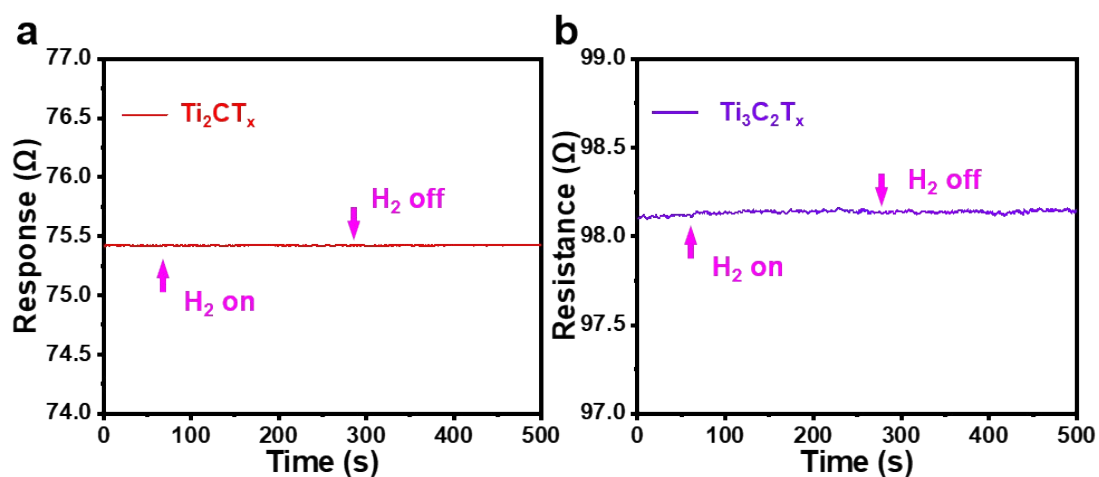

**Fig. S9** Dynamic response-recovery curves of the bare  $\text{Ti}_2\text{CT}_x$  (a) and the bare  $\text{Ti}_3\text{C}_2\text{T}_x$  (b) to 200 ppm  $\text{H}_2$  at room temperature.

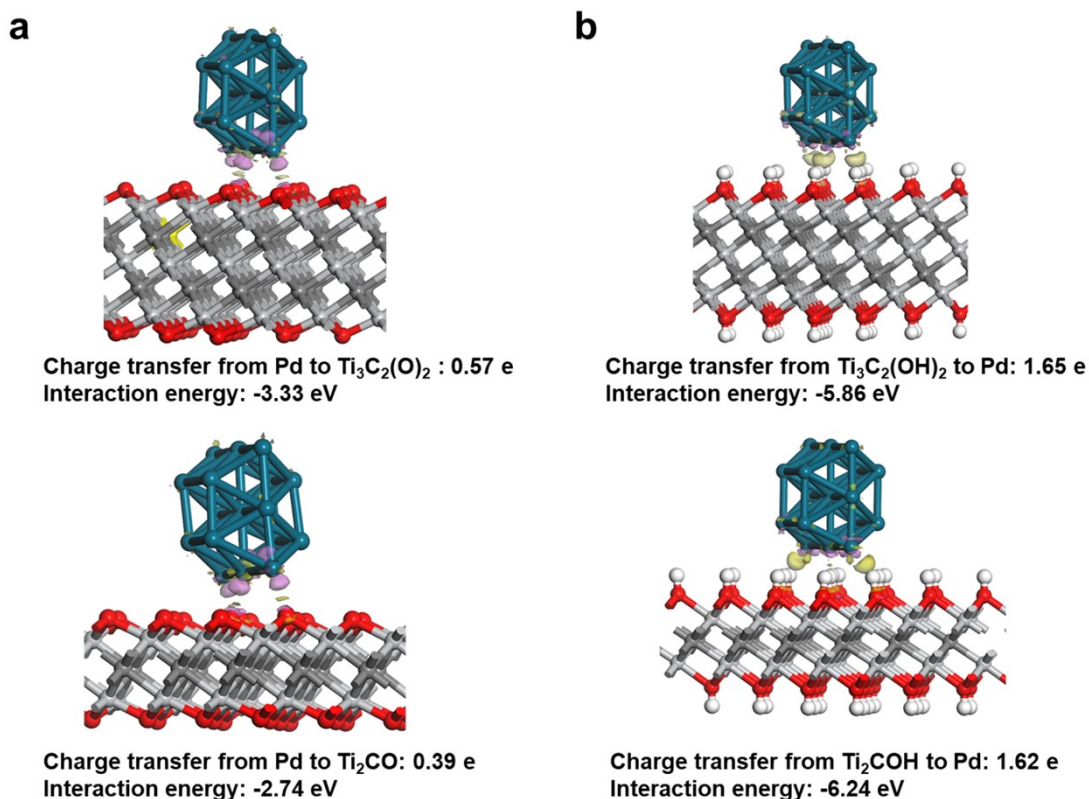

**Fig. S10** Simulated electron density difference distribution of Pd/ $\text{Ti}_2\text{C}$  and Pd/ $\text{Ti}_3\text{C}_2$  with epoxy functional groups (a) and hydroxyl function groups (b). Yellow indicates electron deficient regions and purple indicates electron rich regions.

The calculated results indicate that MXenes with epoxy function groups act as charge acceptors, and the charge transfer from Pd to  $\text{Ti}_3\text{C}_2(\text{O})_2$  (0.57 e) is higher than that of  $\text{Ti}_2\text{CO}$  (0.39 e). While MXenes with hydroxyl function groups act as charge donors, and the charge transfer from  $\text{Ti}_3\text{C}_2(\text{OH})_2$  to Pd (1.65) is similar to that of  $\text{Ti}_2\text{COH}$  (1.62 e). To further detail the charge transfer differences between MXenes and Pd nanodots, the ratio of epoxy function groups to hydroxyl function groups was firstly calculated by extracting the XPS fitting peak area. Afterwards, based on the ratio of function groups, the charge transfer from  $\text{Ti}_2\text{CT}_x$  to Pd was calculated as 1.34 e, which is higher than that of  $\text{Ti}_3\text{C}_2\text{T}_x$  (1.2), in accordance with the results that obtained from theoretical model without functional groups.
